# Supplementary material for: Calculative Trust and Interfirm Contracts
Source: Atypon-hosted journal article supplement (doi:10.1287/mnsc.2019.3394), 2020-02-19
Supplement: mnsc.2019.3394.sm1.pdf [file mnsc.2019.3394.sm1.pdf]

**Online Appendix**  
**Manuscript MS-17-02271**  
**“Calculative Trust and Interfirm Contracts”**

**Figure 1**  
Contract Choice

**Panel A: Spot FP Contract**

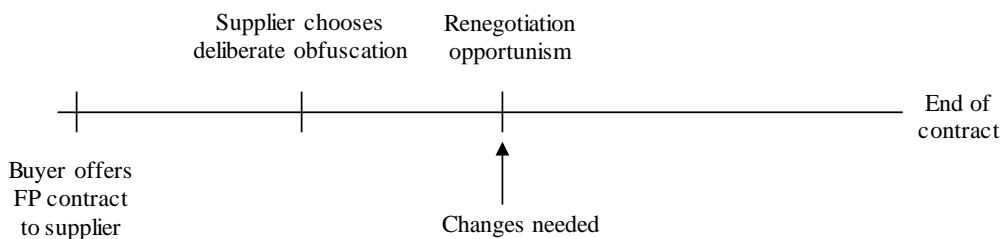

**Panel B: Spot CP Contract**

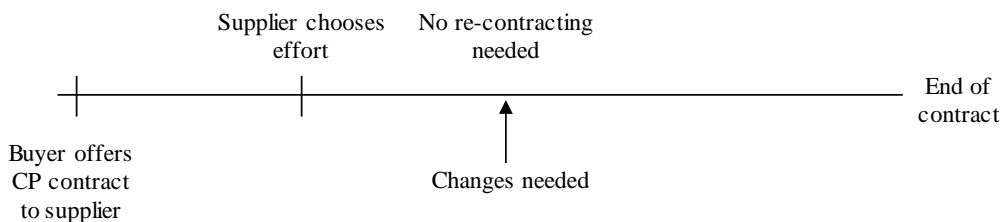

**Panel C: FP Contract with Future Potential**

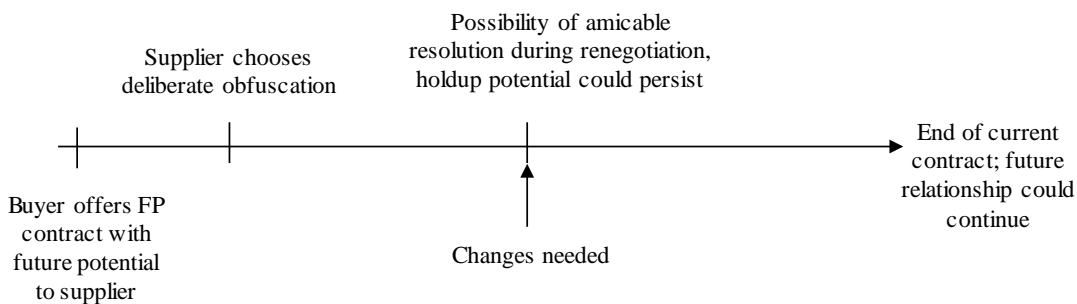

**Panel D: CP Contract with Future Potential**

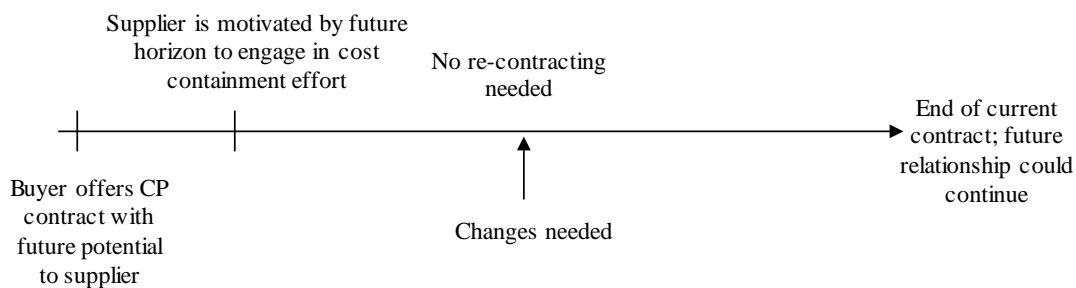

**Table A1**  
**Literature on Contract Choice**

| <b>Study (Authors, Year)</b>      | <b>Dependent Variables</b>                                        | <b>Independent Variables</b>                                                                                                                                                                              | <b>Data Source</b>                                                             | <b>Findings</b>                                                                                                                                                        |
|-----------------------------------|-------------------------------------------------------------------|-----------------------------------------------------------------------------------------------------------------------------------------------------------------------------------------------------------|--------------------------------------------------------------------------------|------------------------------------------------------------------------------------------------------------------------------------------------------------------------|
| Leffler and Rucker (1991)         | FP or CP contract choice                                          | Pre-sale measurement costs, contract enforcement costs, monitoring costs                                                                                                                                  | 188 timber-harvesting contracts in North Carolina                              | Pre-sale measurement costs, contract enforcement and monitoring increase the use of CP contracts                                                                       |
| Crocker and Reynolds (1993)       | FP or CP contract choice                                          | Opportunism (disputes, alternative suppliers' availability), environmental uncertainty                                                                                                                    | 44 air force contracts between 1972-1991                                       | Opportunism is associated with FP contracts, uncertainty associated with CP contracts                                                                                  |
| Banerjee and Duflo (2000)         | FP or CP contract choice, share of overrun paid by supplier       | Buyer reputation (firm age, previous experience with client, ISO certification)                                                                                                                           | 125 Indian software firms for the period 1997-98                               | Reputation increases likelihood of CP contracts                                                                                                                        |
| Gopal et al. (2003)               | FP or CP contract choice                                          | Uncertainty, contract size, risk of availability of trained personnel, client experience, client reputation, future business, client size, project importance to client, competition, previous experience | 93 IT contracts from an Indian offshore development firm                       | Uncertainty, contract size, risk of availability of trained personnel, client size, project importance to client, previous experience are associated with CP contracts |
| Corts and Singh (2004)            | FP or CP contract choice                                          | Exploratory contract, task complexity, recent contracts between same dyad in the preceding six months                                                                                                     | 1,874 off-shore oil drilling projects for the period January 1998-October 2000 | Repeated interactions reduces the use of FP contracts                                                                                                                  |
| Kalnins and Meyer (2004)          | FP, CP, or hybrid choice                                          | Cost and specification uncertainty, quality measurability, and prior relationship                                                                                                                         | 394 contracts from one company                                                 | Higher cost and specification uncertainty, lower measurability of quality, and prior relationship increase likelihood of CP                                            |
| Gopal and Sivaramakrishnan (2008) | FP or CP contract choice, profit expectation from contract choice | Employee turnover, project size and duration, number of prior projects                                                                                                                                    | 93 IT contracts from an Indian offshore development firm                       | Project duration, project size, and team size (employee turnover) increase vendor preference for FP (CP) contracts                                                     |

|                                  |                                                                    |                                                                                                                                   |                                                                               |                                                                                          |
|----------------------------------|--------------------------------------------------------------------|-----------------------------------------------------------------------------------------------------------------------------------|-------------------------------------------------------------------------------|------------------------------------------------------------------------------------------|
| Bajari, McMillan, Tadelis (2009) | FP (auction) or CP (negotiation) contract choice                   | Project complexity, buyer experience, buyer size, buyer risk                                                                      | 4,100 nonresidential building construction projects for 1995-2000 time period | Complexity decreases use of FP contracts, buyer experience increases use of FP contracts |
| Gopal and Koka (2010)            | FP or CP contract, relational flexibility, profit, service quality | Requirements instability, employee turnover, asset specificity, prior projects, client experience, project size, project duration | 105 projects from a software firm                                             | Relational flexibility influences profit of FP contracts and quality of CP contracts     |
| Kellogg (2011)                   | FP or CP contract choice                                           | Task uncertainty, project scope, supplier size, buyer size, relationship length                                                   | 19,059 off-shore oil wells for 1991-2005 time period                          | Task uncertainty, supplier size, relationship length increases use of CP contracts       |
| This paper                       | FP or CP contract choice                                           | Calculative trust arising from future potential and bilateral reputation capital                                                  | 149 SEC material contracts                                                    | Calculative trust increases use of CP contracts                                          |

**Table A2**  
**Literature on Relational Interfirm Contracting**

| <b>Study (Authors, Year)</b>         | <b>Dependent Variables</b>                                                | <b>Independent Variable</b>                                                                            | <b>Data Source</b>                                                                                    | <b>Findings</b>                                                                            |
|--------------------------------------|---------------------------------------------------------------------------|--------------------------------------------------------------------------------------------------------|-------------------------------------------------------------------------------------------------------|--------------------------------------------------------------------------------------------|
| Gulati (1995)                        | Equity-based alliance                                                     | Prior ties (number of previous alliances between firms)                                                | 2,400 publicly announced alliances in biopharmaceuticals, new materials and automotive from 1970-1989 | Previous alliances decreases equity based governance in alliances                          |
| Gulati and Singh (1998)              | Joint venture, minority equity investment or contractual alliance         | Prior ties (number of previous alliances between firms)                                                | 1,570 publicly announced alliances in biopharmaceuticals, new materials and automotive from 1970-1989 | Previous alliances decrease minority equity investments and joint ventures                 |
| MacMillan and Woodruff (1999)        | Trade-credit granted                                                      | Customer lock-in (number of competitors within close proximity), prior ties (duration of relationship) | Survey of 259 private sector firms in Vietnam from 1995-1997                                          | Customer lock-in and longer relationship duration increase customer credit                 |
| Banerjee and Duflo (2000)            | FP or CP contract choice, cost overrun paid by the supplier               | Prior ties (repeated relationship), young supplier, ISO certification                                  | 125 Indian software firms for the period 1997-98                                                      | Young age supplier increases likelihood of CP contracts                                    |
| Gopal et al. (2003)                  | FP or CP contract choice                                                  | Future business potential, prior ties (number of prior projects)                                       | 93 IT contracts from an Indian offshore development firm                                              | Number of prior projects decreases use of FP contracts                                     |
| Corts and Singh (2004)               | FP or CP contract choice                                                  | Prior ties (Recent contracts between same dyad in the preceding six months)                            | 1,874 off-shore oil drilling projects for the period January 1998-October 2000                        | Repeated interactions reduces the use of FP contracts                                      |
| Kalnins and Mayer (2004)             | FP, CP, or Hybrid choice                                                  | Prior ties (amount paid for previous projects)                                                         | 394 contracts from one company                                                                        | Prior relationship increases likelihood of CP                                              |
| Argyres, Bercovitz, and Mayer (2007) | Task description, contingency planning                                    | Prior ties (relationship length)                                                                       | 405 IT contracts from a company                                                                       | Relationship length increases contingency planning                                         |
| Ryall and Sampson (2009)             | Level and type of contractual detail, monitoring clauses, Penalty Clauses | Prior ties (Prior dyadic experience, concurrent deals), prior ties with other clients                  | 52 SEC material contracts from 1991-2000                                                              | Contract detail increases with prior dyadic experience and decreases with concurrent deals |
| Kellogg (2011)                       | FP or CP contract choice                                                  | Prior ties (relationship length)                                                                       | 19,059 off-shore oil wells for 1991-2005 time period                                                  | Relationship length increases use of CP contracts                                          |

|                                  |                                                                              |                                                                                                                        |                                                                                                                           |                                                                                                                                                                                                                                               |
|----------------------------------|------------------------------------------------------------------------------|------------------------------------------------------------------------------------------------------------------------|---------------------------------------------------------------------------------------------------------------------------|-----------------------------------------------------------------------------------------------------------------------------------------------------------------------------------------------------------------------------------------------|
| Gopal and Koka (2012)            | FP or CP contract, perceived relational flexibility, profit, service quality | Prior ties (repeated interaction)                                                                                      | 105 projects from a software firm                                                                                         | Repeated interaction increases use of CP contracts and increases relational flexibility, relational flexibility influences profit of FP contracts and quality of CP contracts                                                                 |
| Gil and Marion (2012)            | Auction entry, bids                                                          | Prior ties (prior interactions between contractor and subcontractors), future contracts up for bid, relationship depth | 5,120 public highway construction procurement auctions conducted by the California Department of Transportation (Caltran) | Stock of prior relationship increases lower bids and auction entry, but only when future contracts are up for bid in the following year                                                                                                       |
| Macchiavello and Morjaria (2015) | Trade volume within relationship, relationship value, reliability of supply  | Spot market price, ethnic violence in the wake of Kenyan presidential elections, prior ties (previous shipments)       | Kenyan rose exports in years 2004-2008                                                                                    | Trade-volume within a relationship is negatively associated spot market price, but positively associated with previous shipments<br>Incentives to protect reputation improve supplier reliability performance                                 |
| Poppo, Zhou and Li (2016)        | Perceived supplier performance                                               | Perceived calculative and relational trust, prior experience                                                           | Survey on 211 supplier-buyer dyads from Chinese firms                                                                     | Prior experience increases calculative and relational trust<br>calculative and relational trust improve buyer performance yet asset specificity, supply market uncertainty and behavioral uncertainty moderate these effects in opposite ways |

**Table A3****Future Potential Equation Estimates from the Recursive, Simultaneous Bivariate Probit**

|                                                          | Future potential |
|----------------------------------------------------------|------------------|
| <b>Exclusion restriction</b>                             |                  |
| Multisourcing                                            | 0.04 (0.00)***   |
| Extension of previous contract                           | -0.42 (0.20)**   |
| <b>Controls</b>                                          |                  |
| Controls for size, bargaining power, log (contract val)  | yes              |
| Controls for contract contingencies and monitoring terms | yes              |
| <b>Constant</b>                                          | 0.07 (0.47)      |

Notes: The pseudo  $R^2$  of the above model is 0.27. Significance levels shown are based on two-tailed t-tests. Please see Table 2 for variable definitions. \*  $p < .10$ , \*\*  $p < .05$ , \*\*\*  $p < .01$ .
